# Supplementary material
Source: MDPI journal article supplement (https://www.mdpi.com/2073-4441/13/9/1320)
Supplement: s1 [file s1 › water-1164087 - suppl FINAL for update S.pdf]

## Supplementary Materials

# Structure and Dynamics of Interfacial Water on Muscovite Surface under Different Temperature Conditions (298 K to 673 K): Molecular Dynamics Investigation

Masashige Shiga <sup>1,2,\*</sup>, Masaatsu Aichi <sup>2</sup>, Masao Sorai <sup>1</sup> and Tetsuya Morishita <sup>3,4</sup>

**Table S1.** Distance between two muscovite surfaces (nm); note that the number of H<sub>2</sub>O molecules at 0.1 MPa/523 K and 0.1 MPa/573 K is 1000 while that at other conditions is 1400.

| Pressure (MPa) | Temperature (K) |     |     |     |     |     |     |      |     |
|----------------|-----------------|-----|-----|-----|-----|-----|-----|------|-----|
|                | 298             | 323 | 373 | 423 | 473 | 523 | 573 | 623  | 673 |
| 0.1            | 4.9             | 5.0 | 5.1 | 5.4 | 5.8 | 4.5 | 5.1 | -    | -   |
| 10.0           | 4.9             | 4.9 | 5.1 | 5.4 | 5.7 | 6.2 | 7.1 | 10.1 | -   |
| 50.0           | 4.8             | 4.9 | 5.0 | 5.2 | 5.5 | 5.9 | 6.4 | 7.2  | 8.7 |

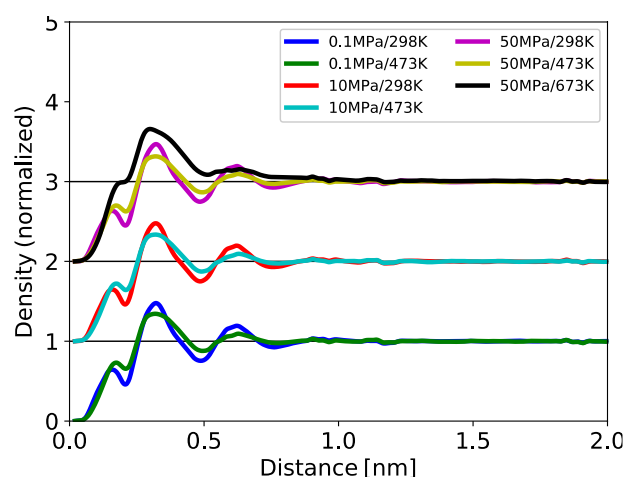

**Figure S1.** Normalized density profiles of H<sub>2</sub>O. Plots have been shifted for clarity.

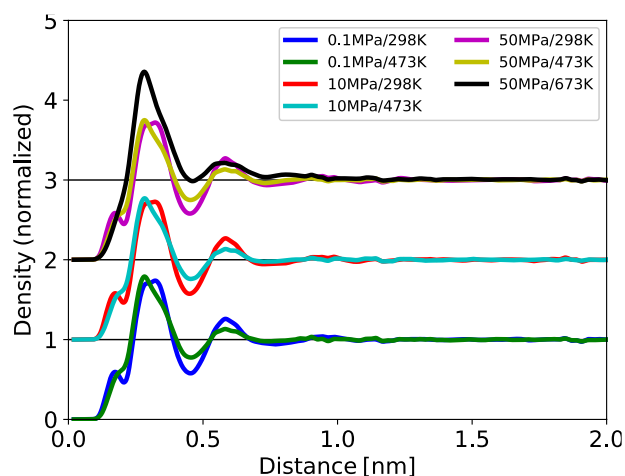

**Figure S2.** Normalized density profiles of oxygen of H<sub>2</sub>O. Plots have been shifted for clarity.

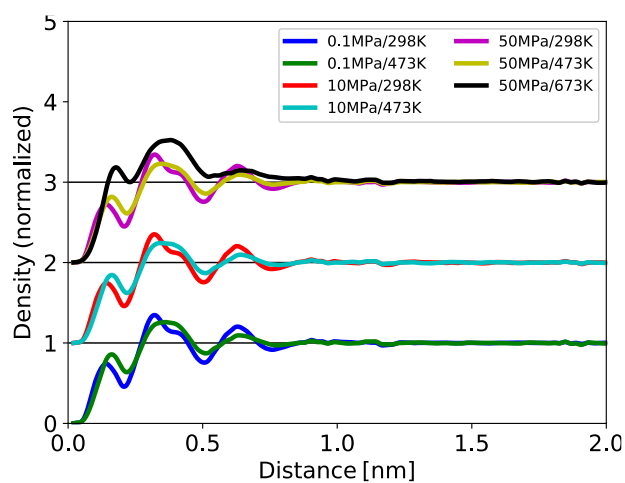

**Figure S3.** Normalized density profiles of hydrogen of H<sub>2</sub>O. Plots have been shifted for clarity.

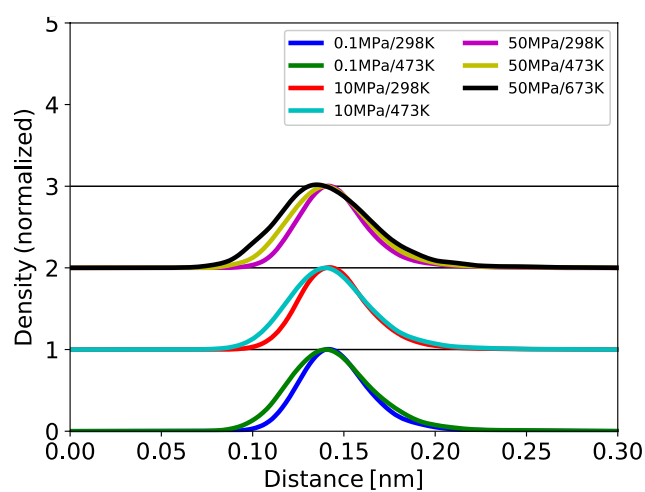

**Figure S4.** Normalized density profiles of K<sup>+</sup> on the muscovite surface. Plots have been shifted for clarity.

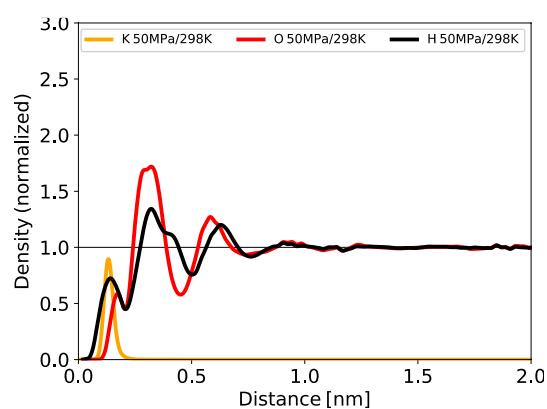

(a) 50 MPa/298 K

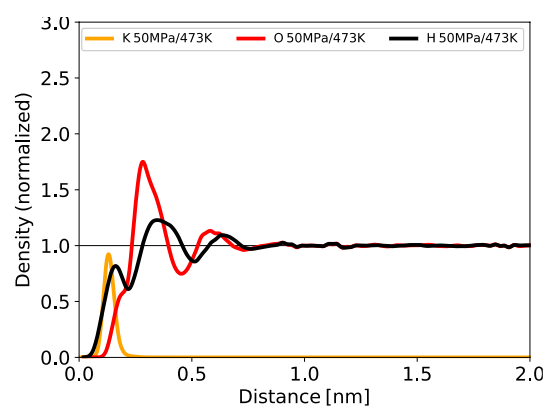

(b) 50 MPa/473 K

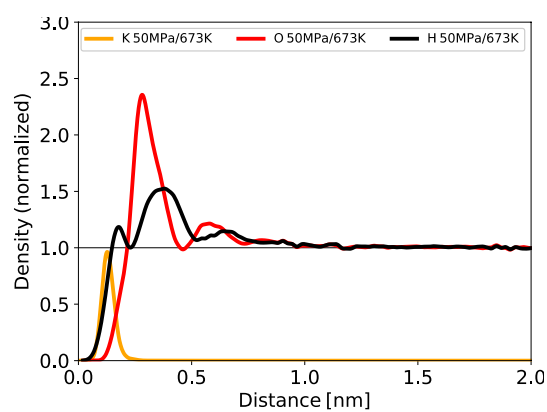

(c) 50 MPa/673 K

**Figure S5.** Normalized density profiles of K<sup>+</sup>, O (H<sub>2</sub>O), and H (H<sub>2</sub>O). Plots have been shifted for clarity.

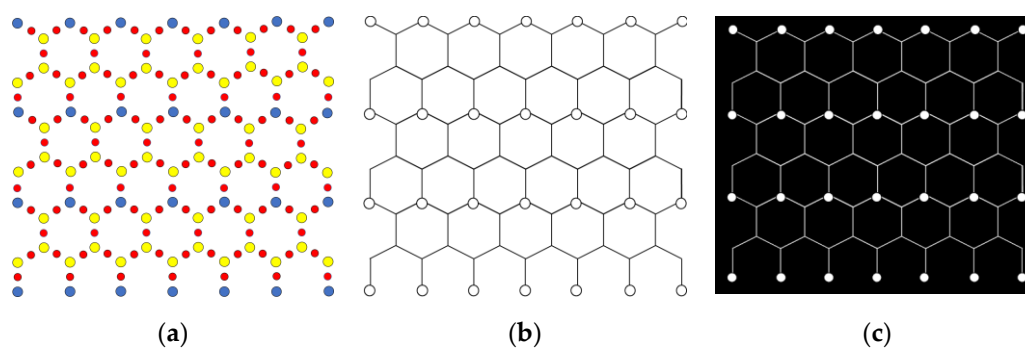

**Figure S6.** Schematic images of the lattice of (0 0 1) surface of muscovite; Al is represented by the blue circles in (a) and the white circles in (b) and (c).

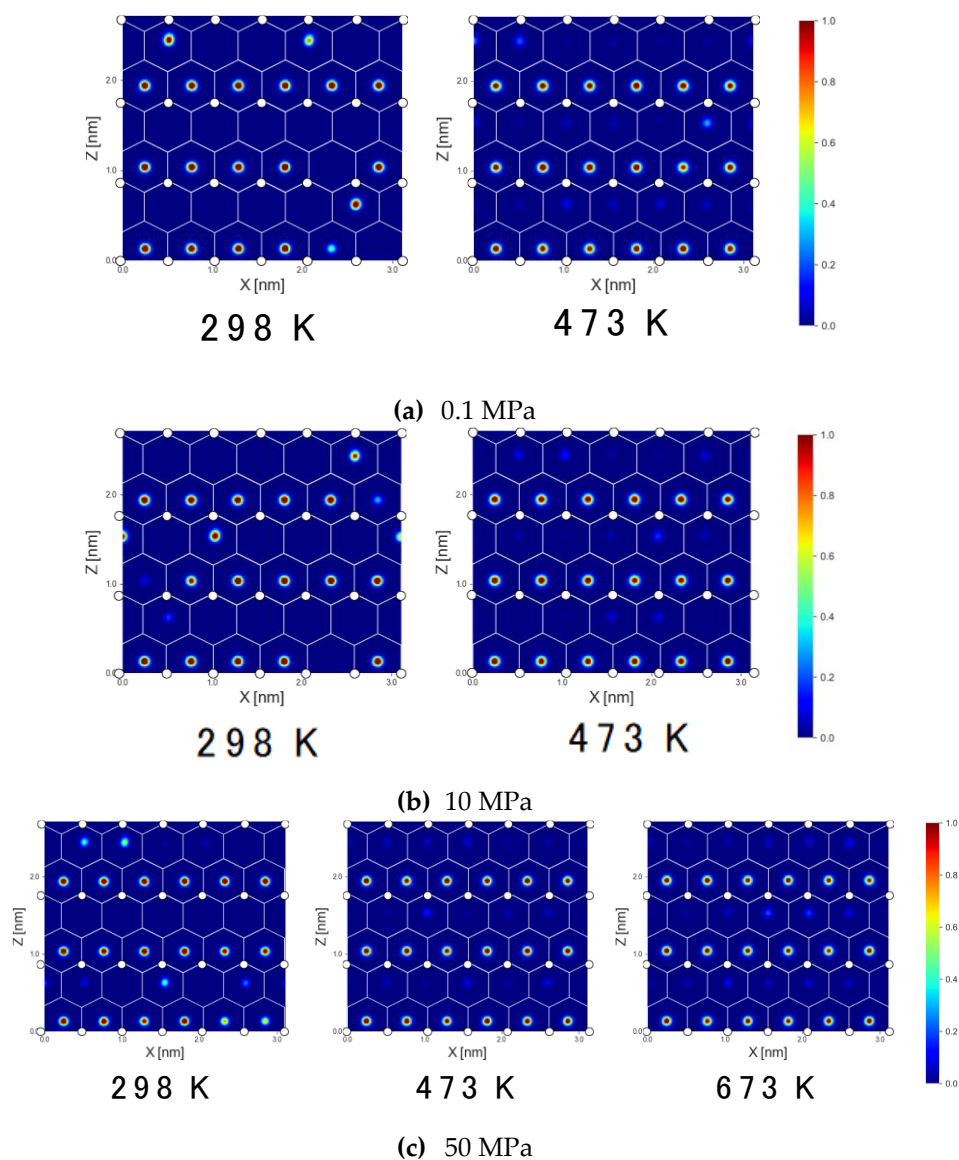

**Figure S7.** 2D normalized density maps of  $K^+$  on the muscovite surface; the lattice on the map is from Figure S6.

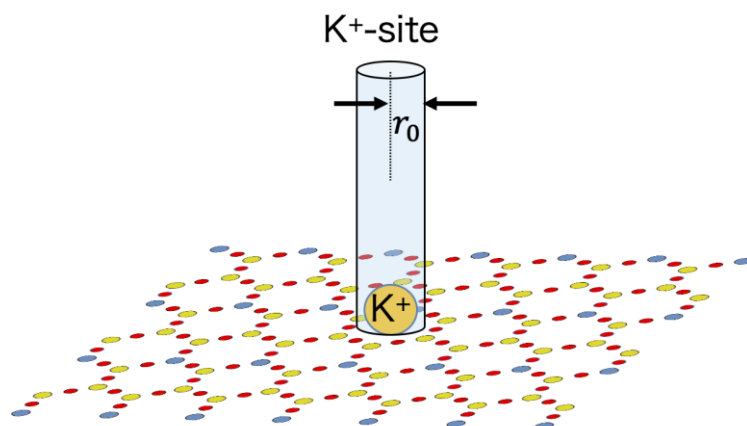

**Figure S8.** Schematic image of one  $K^+$ -site for calculating profiles of density and the orientation angle:  $r_0$  was set to be 0.138 nm, which is the ionic radius of  $K^+$ .

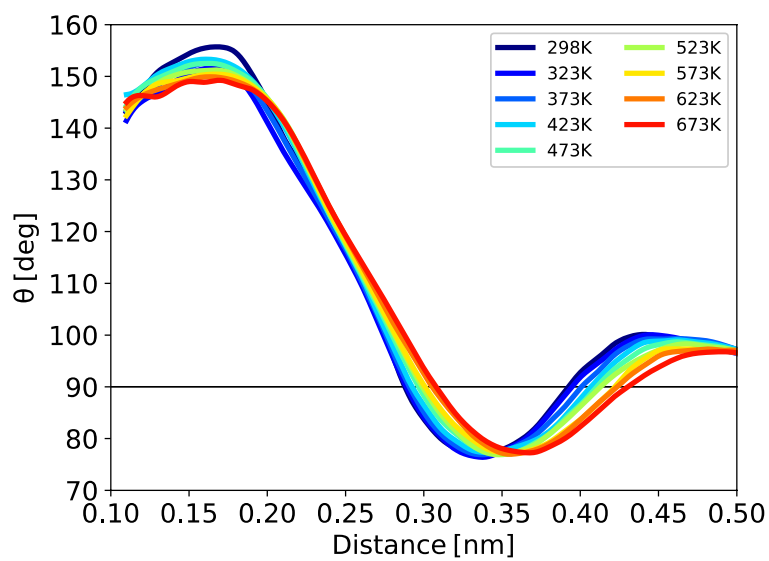

**Figure S9.** Enlarged view of Figure 8c; 1D profiles of the orientation angle  $\theta$  from the muscovite surface at 50 MPa.

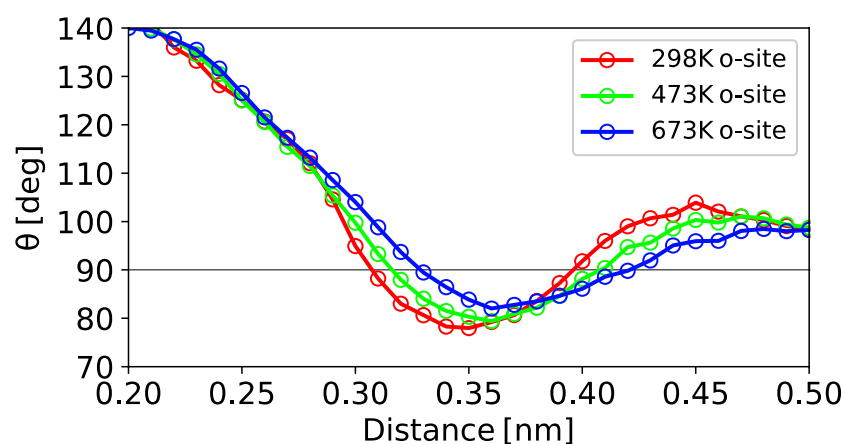

**Figure S10.** Enlarged view of the part of Figure 10; 1D Profiles of the orientation angle  $\theta$  on o-site in the second layer ( $0.2 \text{ nm} < d < 0.5 \text{ nm}$ ).

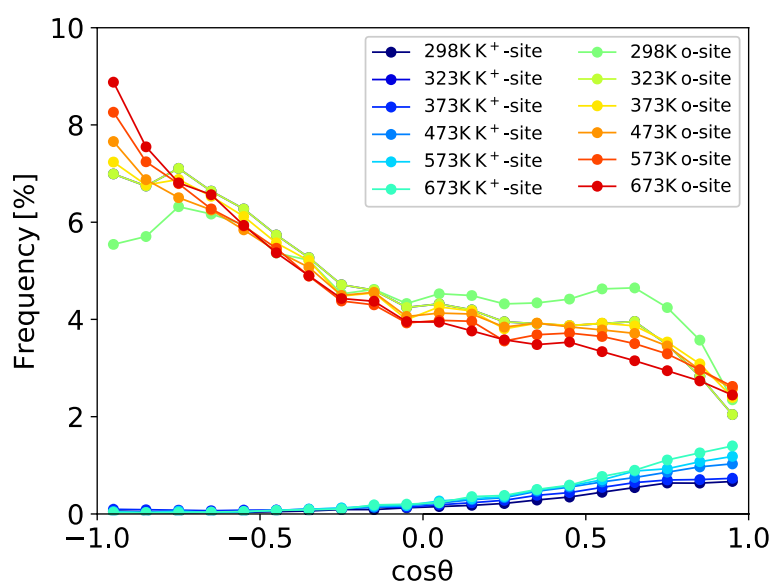

**Figure S11.** Distributions of  $\cos\theta$  on  $\text{K}^+$ -site and o-site at the second layer at 50 MPa.

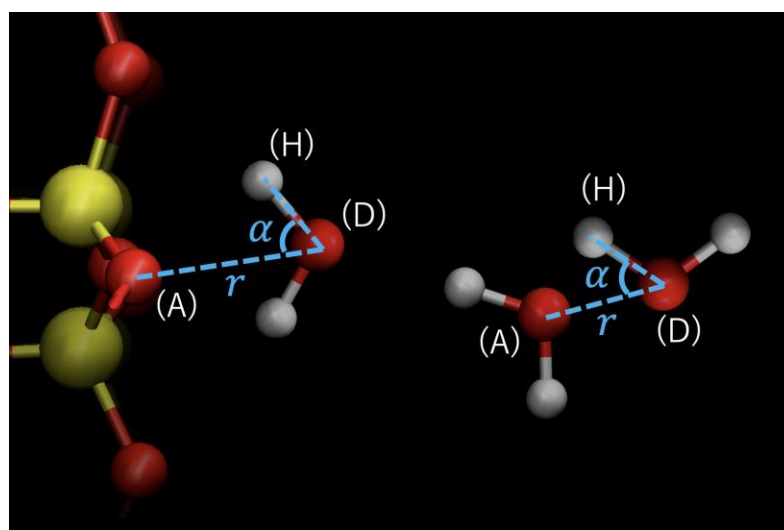

**Figure S12.** Schematic image of the definition of hydrogen bond [57]; the geometrical criterion related to (D) Donor, (H) Hydrogen and (A) Acceptor is  $r < r_{HB} = 0.35$  nm and  $\alpha < \alpha_{HB} = 30^\circ$ .  $r_{HB}$  is the range of the first coordination shell of a  $H_2O$  molecule. Hydrogen bonds break when the amplitude of the libration is about  $\alpha_{HB}$ .

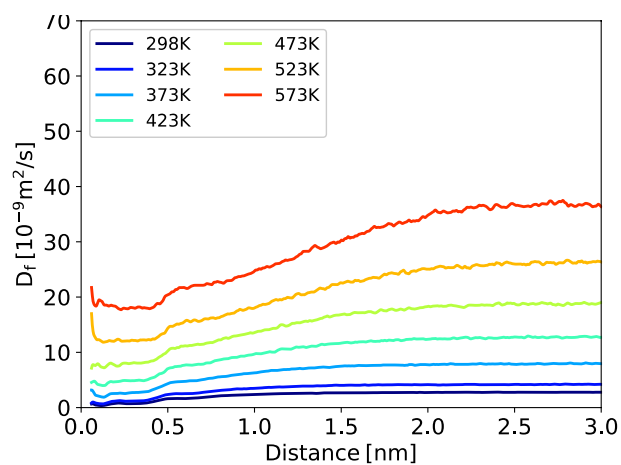

(a) 0.1 MPa

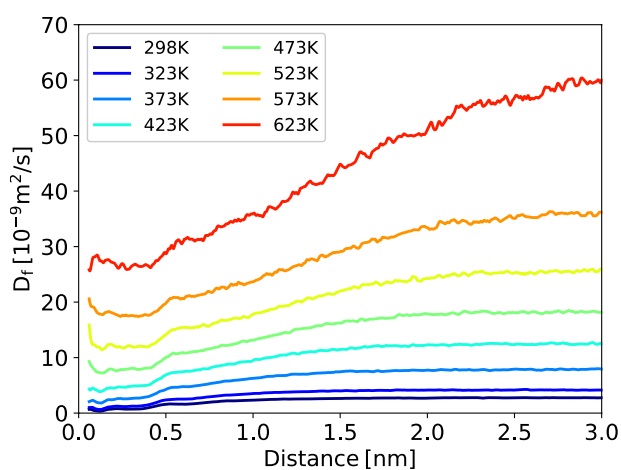

(b) 10 MPa

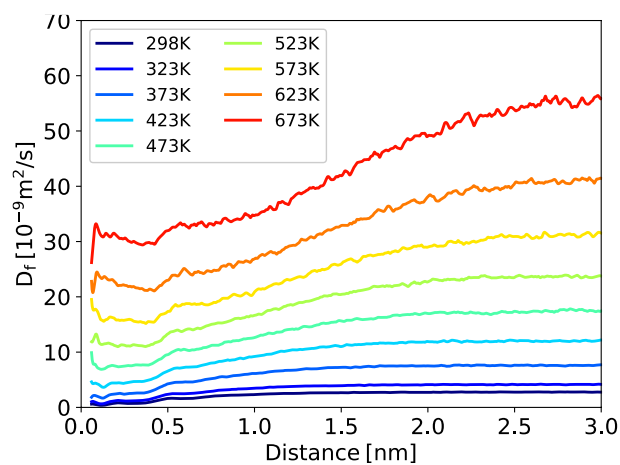

(c) 50 MPa

**Figure S13.** Self-diffusion coefficient of H<sub>2</sub>O molecules vs distance from the muscovite surface.
